# Supplementary material for: Sneaking into a Hotspot of Biodiversity: Coverage and Integrity of a Rhodolith Bed in the Strait of Sicily (Central Mediterranean Sea)
Source: MDPI journal article supplement (doi:10.3390/jmse10121808), 2022-11-23
Supplement: s1 [file s1]

**Sneaking into a hotspot of biodiversity: coverage and integrity of a rhodolith bed in the Strait of Sicily (Central Mediterranean Sea).**  
**Journal of Marine Science and Engineering**

Maggio T., Perzia P., Pazzini A., Campagnuolo S., Falautano M., Mannino A.M., Allegra A., Castriota L.

ISPRA, Italian Institute for Environmental Protection and Research, Lungomare Cristoforo Colombo n. 4521, 90149 Palermo, Italy [teresa.maggio@isprambiente.it](mailto:teresa.maggio@isprambiente.it)

**Table S1.** List of species/taxa detected on Lampedusa rhodolith bed.

| <b>Taxonomic group</b> | <b>Taxon</b>                                    | <b>Author</b>                                                   |
|------------------------|-------------------------------------------------|-----------------------------------------------------------------|
| <b>Ochrophyta</b>      | <i>Cutleria chilosa</i>                         | (Falkenberg) P.C. Silva 1957                                    |
|                        | <i>Cystoseira dubia</i>                         | Valiante 1883                                                   |
|                        | <i>Dictyota dichotoma</i> var. <i>intricata</i> | (C. Agardh) Greville 1830                                       |
|                        | <i>Halopteris filicina</i>                      | (Grateloup) Kützing 1843                                        |
|                        | <i>Lobophora variegata</i>                      | (J.V. Lamouroux) Womersley ex E.C. Oliveira 1977                |
|                        | <i>Sphacelaria</i> sp.                          | Lyngbye, 1818                                                   |
|                        | <i>Sporochnus pedunculatus</i>                  | (Hudson) C. Agardh 1817                                         |
|                        | <i>Zonaria tournefortii</i>                     | (J.V. Lamouroux) Montagne 1846                                  |
| <b>Rhodophyta</b>      | <i>Alsidium corallinum</i>                      | C. Agardh, 1827                                                 |
|                        | <i>Ceramium codii</i>                           | (H.Richards) Mazoyer, 1938.                                     |
|                        | <i>Champia parvula</i>                          | (C. Agardh) Harvey 1853                                         |
|                        | <i>Chondria capillaris</i>                      | (Hudson) M.J. Wynne 1991                                        |
|                        | <i>Cryptonemia palmetta</i>                     | (S.G. Gmelin) Woelkering, G. Furnari, Cormaci & J. McNeill 2019 |
|                        | <i>Cryptopleura ramosa</i>                      | (Hudson) L. Newton 1931                                         |
|                        | <i>Eupogodon planus</i>                         | (C. Agardh) Kützing 1845                                        |
|                        | <i>Gelidium pectinatum</i>                      | (Montagne) Montagne 1846                                        |
|                        | <i>Gracilaria gracilis</i>                      | (Stackhouse) Steentoft, L.M. Irvine & Farnham 1995              |
|                        | <i>Hydrolithon farinosum</i>                    | (J.V. Lamouroux) Penrose et Y.M. Chamberlain 1993               |
|                        | <i>Meredithia microphylla</i>                   | (J. Agardh) J. Agardh 1892                                      |
|                        | <i>Osmundaria volubilis</i>                     | (Linnaeus) R.E. Norris 1991                                     |
|                        | <i>Osmundea pelagosae</i>                       | (Schiffner) K.W. Nam in K.W. Nam,                               |

Maggs & Garbary

|                                 |                                         |
|---------------------------------|-----------------------------------------|
| <i>Peyssonnelia dubyi</i>       | P. Crouan & H. Crouan 1844              |
| <i>Peyssonnelia harveyana</i>   | P. Crouan & H. Crouan ex J. Agardh 1851 |
| <i>Peyssonnelia rubra</i>       | (Greville) J. Agardh 1851               |
| <i>Phyllophora crispa</i>       | (Hudson) P.S. Dixon 1964                |
| <i>Pneophyllum confervicola</i> | (Kützinger) Y.M. Chamberlain 1964       |
| <i>Polysiphonia</i> sp.         | Greville, 1823                          |
| <i>Rhodophyllis divaricata</i>  | (Stackhouse) Papenfuss 1950             |
| <i>Rytidhlaea tinctoria</i>     | (Clemente) C. Agardh 1824               |

---

**Crustacea**

|                                   |                                   |
|-----------------------------------|-----------------------------------|
| <i>Ampelisca pseudospinimana</i>  | Bellan-Santini & Kaim-Malka, 1977 |
| <i>Alpheus macrocheles</i>        | (Hailstone, 1835)                 |
| <i>Ampelisca</i> sp.              | Krøyer, 1842                      |
| <i>Anapagurus</i> sp.             | Henderson, 1886                   |
| <i>Anchialina</i> sp.             | Norman & Scott, 1906              |
| <i>Anthuridae</i>                 | Leach, 1814                       |
| <i>Apherusa vexatrix</i>          | Krapp-Schickel, 1979              |
| <i>Apseudes talpa</i>             | (Montagu, 1808)                   |
| <i>Aristias neglectus</i>         | Hansen, 1888                      |
| <i>Asellota</i>                   | Latreille, 1802                   |
| <i>Astacilla mediterranea</i>     | Koehler, 1911                     |
| <i>Athanas nitescens</i>          | (Leach, 1813)                     |
| <i>Bodotriidae</i>                | T. Scott, 1901                    |
| <i>Brachyura</i>                  | Latreille, 1802                   |
| <i>Centraloecetes dellavallei</i> | (Stebbing 1899)                   |
| <i>Cheirocratus sundevalli</i>    | (Rathke, 1843)                    |
| <i>Chondrochelia savignyi</i>     | (Kroyer, 1842)                    |
| <i>Cymodoce truncata</i>          | Leach, 1814                       |
| <i>Cypridina mediterranea</i>     | (Costa, 1845)                     |
| <i>Ebalia edwardsii</i>           | Costa, 1838                       |
| <i>Elasmopus rapax</i>            | Costa, 1853                       |
| <i>Elasmopus</i> sp.              | Costa, 1853                       |

|                                  |                                         |
|----------------------------------|-----------------------------------------|
| <i>Eurydice truncata</i>         | (Norman, 1868)                          |
| <i>Eusirus longipes</i>          | Boeck, 1861                             |
| <i>Galathea intermedia</i>       | Lilljeborg, 1851                        |
| <i>Gammarella fucicola</i>       | (Leach, 1814)                           |
| <i>Gastrosaccinae</i>            | Norman, 1892                            |
| <i>Gastrosaccus sanctus</i>      | (Van Beneden, 1861)                     |
| <i>Gnathiidae</i>                | Leach, 1814                             |
| <i>Haplostylus normani</i>       | (G.O. Sars, 1877)                       |
| <i>Harpinia zavodniki</i>        | Karaman, 1987                           |
| <i>Heterotanais oerstedii</i>    | (Krøyer, 1842)                          |
| <i>Hippomedon massiliensis</i>   | Bellan-Santini, 1965                    |
| <i>Iphinoe serrata</i>           | Norman, 1867                            |
| <i>Iphinoe</i> sp.               | Bate, 1856                              |
| <i>Iphinoe tenella</i>           | Sars, 1878                              |
| <i>Joeropsis</i> sp.             | Koehler, 1885                           |
| <i>Leptocheirus guttatus</i>     | (Grube, 1864)                           |
| <i>Leptocheirus hirsutimanus</i> | (Spence Bate, 1862)                     |
| <i>Leptocheirus pectinatus</i>   | (Norman, 1869)                          |
| <i>Leucothoe richardii</i>       | Lesson, 1865                            |
| <i>Leucothoe venetiarum</i>      | Giordani- Soika, 1950                   |
| <i>Linguimaera caesaris</i>      | Krapp-Schickel, 2003                    |
| <i>Lysianassa costae</i>         | H. Milne Edwards, 1830                  |
| <i>Lysianassidae</i>             | Dana, 1849                              |
| <i>Maera grossimana</i>          | (Montagu, 1808)                         |
| <i>Maera</i> sp.                 | Leach, 1814                             |
| <i>Metaphoxus simplex</i>        | (Spence Bate, 1857)                     |
| <i>Microdeutopus anomalus</i>    | (Rathke, 1843)                          |
| <i>Mysidae</i>                   | Haworth, 1825                           |
| <i>Nebalia</i> sp.               | Leach, 1814                             |
| <i>Nototropis guttatus</i>       | Costa, 1853                             |
| <i>Pagurus alatus</i>            | Fabricius, 1775                         |
| <i>Palicus caronii</i>           | (P. Roux, 1830 [in P. Roux, 1828-1830]) |

|                    |                                             |                      |
|--------------------|---------------------------------------------|----------------------|
|                    | <i>Pereionotus testudo</i>                  | (Montagu, 1808)      |
|                    | <i>Processa canaliculata</i>                | Leach, 1815          |
|                    | <i>Socarnes filicornis</i>                  | (Heller, 1866)       |
|                    | <i>Tanais dulongii</i>                      | (Audouin, 1826)      |
|                    | <i>Urothoe elegans</i>                      | Spence Bate, 1857    |
|                    | <i>Urothoe</i> sp.                          | Dana, 1852           |
| <b>Pycnogonida</b> | <i>Achelia echinata</i>                     | Hodge, 1864          |
|                    | <i>Anoplodactylus petiolatus</i>            | (Krøyer, 1844)       |
|                    | <i>Callipallene emaciata</i>                | (Dohrn, 1881)        |
|                    | <i>Callipallene producta</i>                | (Sars, 1888)         |
|                    | <i>Nymphon brevirostre</i>                  | Hodge, 1863          |
|                    | <i>Nymphon</i> sp.                          | Fabricius, 1794      |
|                    | <i>Pantopoda</i> .                          | Gerstaecker, 1863    |
|                    | <i>Rhynchothorax</i> sp.                    | Costa, 1861          |
| <b>Polychaeta</b>  | <i>Adercodon pleijeli</i>                   | Mackie, 1994         |
|                    | <i>Amphicorina</i> sp.                      | Claparède, 1864      |
|                    | <i>Amphiglena mediterranea</i>              | (Leydig, 1851)       |
|                    | <i>Aonides oxycephala</i>                   | (Sars, 1862)         |
|                    | <i>Aonides</i> sp.                          | Claparède, 1864      |
|                    | <i>Aponuphis bilineata</i>                  | (Baird, 1870)        |
|                    | <i>Aponuphis brementi</i>                   | (Fauvel, 1916)       |
|                    | <i>Arabella iricolor</i>                    | (Montagu, 1804)      |
|                    | <i>Aricidea (Aricidea) pseudoarticulata</i> | Hobson, 1972         |
|                    | <i>Branchiomma</i> sp.                      | Kölliker, 1858       |
|                    | <i>Ceratonereis</i> sp.                     | Kinberg, 1865        |
|                    | <i>Chaetozone</i> sp.                       | Malmgren, 1867       |
|                    | <i>Chone</i> sp.                            | Krøyer, 1856         |
|                    | <i>Chrysopetalum debile</i>                 | (Grube, 1855)        |
|                    | <i>Cirrophorus branchiatus</i>              | Ehlers, 1908         |
|                    | <i>Cossura soyeri</i>                       | Laubier, 1964        |
|                    | <i>Ditrupa arietina</i>                     | (O. F. Müller, 1776) |
|                    | <i>Euchone</i> sp.                          | Malmgren, 1866       |

|                                      |                                   |
|--------------------------------------|-----------------------------------|
| <i>Eunice pennata</i>                | (Müller, 1776)                    |
| <i>Eunice vittata</i>                | (Delle Chiaje, 1828)              |
| <i>Euphrosine foliosa</i>            | Audouin & H Milne Edwards, 1833   |
| <i>Eurysillis tuberculata</i>        | Ehlers, 1864                      |
| <i>Exogone verugera</i>              | (Claparède, 1868)                 |
| <i>Fabriciola</i> sp.                | Friedrich, 1939                   |
| <i>Glycera alba</i>                  | (O.F. Müller, 1776)               |
| <i>Glycera capitata</i>              | Örsted, 1843                      |
| <i>Goniada maculata</i>              | Örsted, 1843                      |
| <i>Hermodice</i> sp.                 | Kinberg, 1857                     |
| <i>Hesione</i> sp.                   | Lamarck, 1818                     |
| <i>Hyalianoecia tubicola</i>         | (O.F. Müller, 1776)               |
| <i>Jasmineira caudata</i>            | Langerhans, 1880                  |
| <i>Jasmineira elegans</i>            | Saint-Joseph, 1894                |
| <i>Jasmineira</i> sp.                | Langerhans, 1880                  |
| <i>Kirkegaardia dorsobranchialis</i> | (Kirkegaard, 1959)                |
| <i>Laonice bahusiensis</i>           | Söderström, 1920                  |
| <i>Lepidasthenia elegans</i>         | (Grube, 1840)                     |
| <i>Lumbrineris latreilli</i>         | Audouin & Milne Edwards, 1833     |
| <i>Lysidice ninetta</i>              | Audouin & H Milne Edwards, 1833   |
| <i>Lysidice unicornis</i>            | (Grube, 1840)                     |
| <i>Maldane</i> sp.                   | Grube, 1860                       |
| <i>Micronephthys longicornis</i>     | (Perejaslavl'tseva, 1891)         |
| <i>Minuspio</i> sp.                  | Malmgren, 1867                    |
| <i>Mysta picta</i>                   | (Quatrefages, 1866)               |
| <i>Nephtys hystericis</i>            | McIntosh, 1900                    |
| <i>Nereis</i> sp.                    | Linnaeus, 1758                    |
| <i>Notomastus aberans</i>            | Day, 1957                         |
| <i>Odontosyllis dugesiana</i>        | Claparède, 1864                   |
| <i>Orbinia latreillii</i>            | (Audouin & H Milne Edwards, 1833) |
| <i>Owenia fusiformis</i>             | Delle Chiaje, 1844                |
| <i>Palola siciliensis</i>            | (Grube, 1840)                     |

|                                    |                          |
|------------------------------------|--------------------------|
| <i>Paradoneis lyra</i>             | (Southern, 1914)         |
| <i>Paralacydonia paradoxa</i>      | Fauvel, 1913             |
| <i>Pectinaria auricoma</i>         | (O.F. Müller, 1776)      |
| <i>Petta pusilla</i>               | Malmgren, 1866           |
| <i>Phyllodoce laminosa</i>         | Savigny in Lamarck, 1818 |
| <i>Phyllodoce schmardaei</i>       | Day, 1963                |
| <i>Pilargis verrucosa</i>          | Saint-Joseph, 1899       |
| <i>Pisone remota</i>               | (Southern, 1914)         |
| <i>Polynoe</i> sp.                 | Lamarck, 1818            |
| <i>Polyophthalmus pictus</i>       | (Dujardin, 1839)         |
| <i>Prionospio</i> sp.              | Malmgren, 1867           |
| <i>Pseudoleiocapitella fauveli</i> | Harmelin, 1964           |
| <i>Pseudopolydora</i> sp.          | Czerniavsky, 1881        |
| <i>Schistomeringos rudolphi</i>    | (Delle Chiaje, 1828)     |
| <i>Scoloplos armiger</i>           | (Müller, 1776)           |
| <i>Sphaerosyllis bulbosa</i>       | Southern, 1914           |
| <i>Sphaerosyllis</i> sp.           | Claparède, 1863          |
| <i>Spio</i> sp.                    | Fabricius, 1785          |
| <i>Streptosyllis bidentata</i>     | Southern, 1914           |
| <i>Syllis amica</i>                | Quatrefages, 1866        |
| <i>Syllis gracilis</i>             | Grube, 1840              |
| <i>Syllis</i> sp.                  | Lamarck, 1818            |
| <i>Terebellides</i> sp.            | Sars, 1835               |
| <i>Vermiliopsis infundibulum</i>   | (Philippi, 1844)         |

---

**Mollusca**

|                               |                         |
|-------------------------------|-------------------------|
| <i>Arca tetragona</i>         | Poli, 1795              |
| <i>Asperarca nodulosa</i>     | (O. F. Müller, 1776)    |
| <i>Astarte sulcata</i>        | (da Costa, 1778)        |
| <i>Clausinella fasciata</i>   | (da Costa, 1778)        |
| <i>Columbella rustica</i> juv | (Linnaeus, 1758)        |
| <i>Digitaria digitaria</i>    | (Linnaeus, 1758)        |
| <i>Dosinia lupinus</i>        | (Linnaeus, 1758)        |
| <i>Eulimella</i> sp.          | Forbes & M'Andrew, 1846 |

|                      |                                               |                                                                   |
|----------------------|-----------------------------------------------|-------------------------------------------------------------------|
|                      | <i>Flexopecten glaber</i> juv                 | (Linnaeus, 1758)                                                  |
|                      | <i>Gibberula simonae</i>                      | Smriglio in Giannuzzi-Savelli,<br>Pusateri, Palmeri & Ebreo, 2003 |
|                      | <i>Gibberula</i> sp juv                       | Swainson, 1840                                                    |
|                      | <i>Glans trapezia</i>                         | (Linnaeus, 1767)                                                  |
|                      | <i>Gouldia minima</i>                         | (Montagu, 1803)                                                   |
|                      | <i>Gregariella semigranata</i>                | (Reeve, 1858)                                                     |
|                      | <i>Isara cornea</i>                           | (Lamarck, 1811)                                                   |
|                      | <i>Laevicardium crassum</i>                   | (Gmelin, 1791)                                                    |
|                      | <i>Lembulus pella</i>                         | (Linnaeus, 1758)                                                  |
|                      | <i>Lepidopleurus</i> sp.                      | Risso, 1826                                                       |
|                      | <i>Loripinus fragilis</i>                     | (Philippi, 1836)                                                  |
|                      | <i>Lucinella divaricata</i>                   | (Linnaeus, 1758)                                                  |
|                      | <i>Modiolula phaseolina</i>                   | (Philippi, 1844)                                                  |
|                      | <i>Modiolus barbatus</i>                      | (Linnaeus, 1758)                                                  |
|                      | <i>Rocellaria dubia</i>                       | (Pennant, 1777)                                                   |
|                      | <i>Solemya togata</i>                         | (Poli, 1791)                                                      |
|                      | <i>Timoclea ovata</i>                         | (Pennant, 1777)                                                   |
|                      | <i>Venus casina</i>                           | Linnaeus, 1758                                                    |
|                      | <i>Volvarina mitrella</i>                     | (Risso, 1826)                                                     |
| <b>Echinodermata</b> | <i>Amphipholis squamata</i> juv.              | (Delle Chiaje, 1828)                                              |
|                      | <i>Echinocyamus pusillus</i>                  | (O.F. Müller, 1776)                                               |
|                      | <i>Hacelia attenuata</i> juv.                 | Gray, 1840                                                        |
|                      | <i>Ophiothrix fragilis</i> juv.               | (Abildgaard in O.F. Müller, 1789)                                 |
|                      | <i>Sphaerechinus granularis</i> juv.          | (Lamarck, 1816)                                                   |
|                      | <i>Stylocidaris affinis</i>                   | (Philippi, 1845)                                                  |
| <b>Sipuncula</b>     | <i>Phascolosoma (Phascolosoma) granulatum</i> | Leuckart, 1828                                                    |
| <b>Chordata</b>      | <i>Branchiostoma lanceolatum</i>              | (Pallas, 1774)                                                    |
